# Supplementary material for: The Association between Iron Deficiency and Renal Outcomes Is Modified by Sex and Anemia in Patients with Chronic Kidney Disease Stage 1–4
Source: MDPI journal article supplement (doi:10.3390/jpm13030521), 2023-03-14
Supplement: s1 [file s1]

Table S1. Multivariate linear regression (fully-adjusted model) for serum iron per 1 SD change

| Variables                  | $\beta$ coefficient | 95% CI           | <i>P</i> value |
|----------------------------|---------------------|------------------|----------------|
| Age (per 1 SD)             | -0.001              | -0.003 to 0.003  | 0.964          |
| Female (vs male)           | -0.238              | -0.324 to -0.152 | <0.001         |
| eGFR (per 1 SD)            | 0.001               | -0.001 to 0.003  | 0.473          |
| Log UPCR (per 1 SD)        | 0.064               | -0.013 to 0.140  | 0.104          |
| DM                         | -0.282              | -0.365 to -0.198 | <0.001         |
| CVD                        | -0.088              | -0.194 to 0.018  | 0.104          |
| Cancer                     | 0.006               | -0.138 to 0.151  | 0.931          |
| Smoker                     | 0.001               | -0.111 to 0.113  | 0.989          |
| Severe liver disease       | 0.106               | -0.093 to 0.306  | 0.296          |
| Hypertension               | 0.006               | -0.074 to 0.086  | 0.879          |
| Hb (per 1 SD)              | 0.123               | 0.101 to 0.146   | <0.001         |
| Log cholesterol            | -0.235              | -0.588 to 0.117  | 0.191          |
| Mean BP (per 1 SD)         | -0.005              | -0.008 to -0.003 | <0.001         |
| Body mass index (per 1 SD) | -0.009              | -0.019 to 0.000  | 0.061          |
| Albumin (per 1 SD)         | 0.150               | 0.051 to 0.249   | 0.003          |
| Log CRP (per 1 SD)         | 0.001               | -0.044 to 0.046  | 0.968          |
| Phosphorus (per 1 SD)      | 0.075               | 0.025 to 0.124   | 0.003          |
| Malnutrition-inflammation* |                     |                  |                |
| Male                       | -0.052              | -0.078 to -0.025 | <0.001         |
| Female                     | -0.003              | -0.032 to 0.025  | 0.807          |

Abbreviations: SD, standard deviation; CI, confidence interval; eGFR, estimated glomerular filtration rate; Log, log-transformation; UPCR, urine protein to creatinine ratio; DM, diabetes mellitus; CVD, cardiovascular disease; Hb, hemoglobin; BP, blood pressure; CRP, C-reactive protein. \* Presence of malnutrition –inflammation was indicated by malnutrition-inflammation score. *P* for interaction <0.05 stratified by gender.
